# Supplementary material for: Establishment of an osteoporosis model in tree shrews by bilateral ovariectomy and comprehensive evaluation
Source: PubMed Central journal article supplement — Exp Ther Med. 2019 Mar 4;17(5):3644–54. doi: 10.3892/etm.2019.7339 (PMC6447825; doi:10.3892/etm.2019.7339), 2019-03-04
Supplement: Supplementary_Data.pdf [file Supplementary_Data.pdf]

Figure S1. Boxplots displaying temporal gene expression for a batch of gene markers associated with osteoporosis. Based on the RNA-seq analysis, CPM is used to denote genes expression levels. \*P<0.05 vs. healthy HM; \*\*P<0.01 vs. sham. CPM, count per million reads; OVX, ovariectomy; HM, human; OP, osteoporotic; ALPL, alkaline phosphatase, biomineralization associated; BGLAP, bone  $\gamma$ -carboxyglutamate protein; RUNX2, runt-related transcription factor 2; SOST, sclerostin; IBSP, integrin binding sialoprotein; SP7, Sp7 transcription factor; OPG, osteoprotegerin.

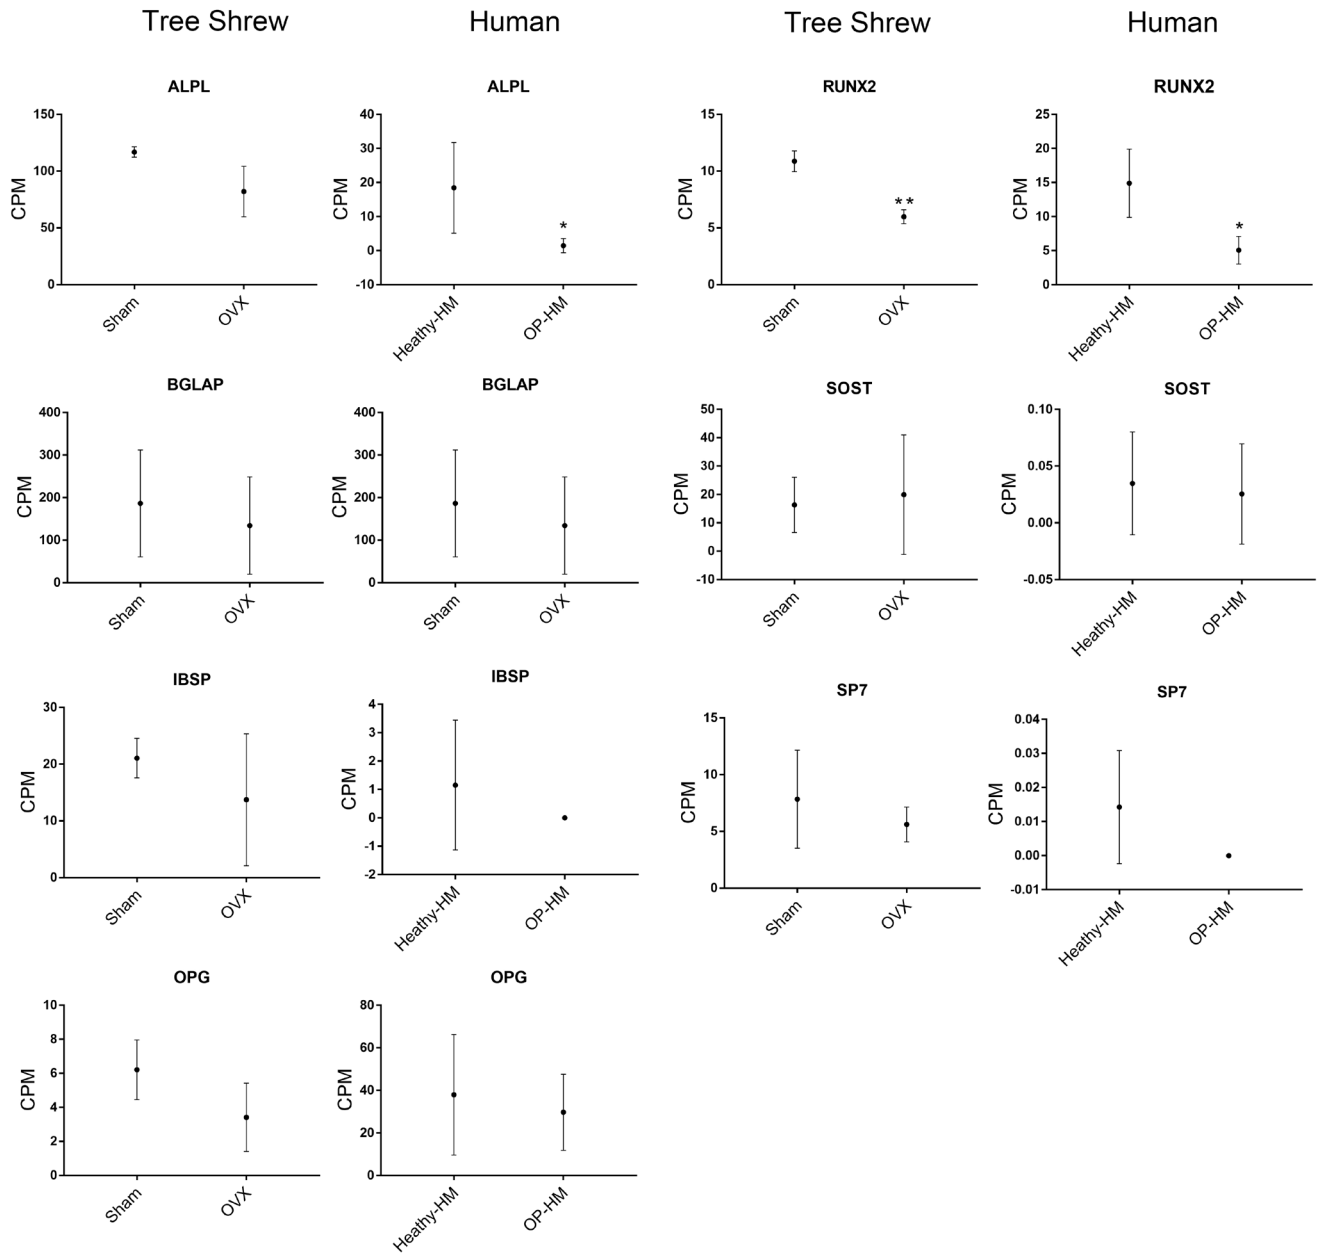

Table SI. Upregulated genes identified in the Ovariectomy vs. Sham group.

| Gene_ID    | Sham FPKM   | Model FPKM  | Blast Swiss gene name |
|------------|-------------|-------------|-----------------------|
| 102468156  | 60.76042513 | 359.0330911 | MDFI                  |
| 102469529  | 7.319695787 | 35.35347076 | TEST                  |
| 102470035  | 56.00766769 | 207.4114605 | RABP2                 |
| 102470343  | 37.89543543 | 166.1338249 | INSC                  |
| 102477388  | 0.453147095 | 8.645531842 | LRCC1                 |
| 102477531  | 16.37517859 | 74.09758313 | PRS33                 |
| 102477966  | 10.69690964 | 56.30402404 | PRS41                 |
| 102478219  | 28.21213454 | 148.7934171 | TDT                   |
| 102482618  | 34.33479383 | 137.6226695 | RSP04                 |
| 102483117  | 28.65534    | 122.1991541 | REM1                  |
| 102483210  | 664.9868972 | 2816.737855 | PDYN                  |
| 102484736  | 6.309577222 | 33.17543821 | RAG2                  |
| 102485521  | 154.6461831 | 848.955805  | SFRP4                 |
| 102486357  | 28.11779774 | 284.5442451 | IGLL5                 |
| 102489772  | 3.649399642 | 21.42196458 | NDUC1                 |
| 102492887  | 871.7265735 | 4147.088408 | SERPH                 |
| 102496350  | 6.978021502 | 49.06377656 | IGLL1                 |
| 102496881  | 11.65352744 | 149.7859715 | VPREB                 |
| 102498123  | 53.79499001 | 323.7544993 | MMP11                 |
| 102498948  | 1.762338604 | 28.89716952 | CAPSL                 |
| 102501856  | 99.08127784 | 567.3478167 | HUTU                  |
| 106734611  | 48.68464985 | 323.202053  | VPRE3                 |
| Novel01457 | 13.34069771 | 83.1494862  | -                     |
| Novel01612 | 3.971905047 | 22.43911315 | -                     |
| Novel01771 | 7.552368757 | 52.02021249 | -                     |
| Novel02203 | 62.9494226  | 305.3002174 | -                     |
| Novel02997 | 54.87082635 | 230.5776488 | -                     |
| Novel03127 | 2.917457074 | 25.14127607 | -                     |
| Novel03719 | 2.679096734 | 21.59458879 | -                     |
| Novel04286 | 30.46591968 | 134.0353164 | -                     |
| Novel04648 | 25.547376   | 107.2941079 | -                     |
| Novel04792 | 20.07411836 | 77.91582197 | -                     |
| Novel05452 | 40.23586409 | 156.5745257 | -                     |

FPKM, fragments per kilobase of transcript per million mapped reads.

Table SII. Downregulated genes identified in the Ovariectomy vs. Sham group.

| Gene_ID    | Sham FPKM   | Model FPKM  | Blast Swiss gene name |
|------------|-------------|-------------|-----------------------|
| 102468786  | 6835.693055 | 1007.568121 | PDK4                  |
| 102469110  | 172.4275157 | 48.53420512 | ONCM                  |
| 102469207  | 1103.950952 | 295.3783168 | SPB10                 |
| 102469268  | 73.42911128 | 11.26841291 | DDIAS                 |
| 102472146  | 145.0653931 | 24.8143509  | GYS2                  |
| 102473349  | 1354.832043 | 296.2078213 | SC6A6                 |
| 102473389  | 9260.784447 | 2302.877737 | RBM3                  |
| 102474225  | 3384.903781 | 72.26283531 | AACT                  |
| 102475225  | 118.1644356 | 31.46908451 | PDZD4                 |
| 102475703  | 133.2714015 | 26.89528509 | EDN1                  |
| 102477091  | 5653.871908 | 217.406566  | TRI63                 |
| 102478468  | 592.4459238 | 147.8363749 | PAI1                  |
| 102478593  | 126.2863505 | 28.07560741 | IL18R                 |
| 102481435  | 6860.775057 | 1536.436963 | PERE                  |
| 102483475  | 340.7392718 | 94.1204547  | PCAT2                 |
| 102484602  | 191.665718  | 45.06391653 | K226L                 |
| 102484756  | 1027.405012 | 285.5624161 | ADH1E                 |
| 102484856  | 370.0839586 | 98.4829365  | ABCA6                 |
| 102484985  | 2070.461452 | 531.6614437 | ADAM8                 |
| 102486222  | 323.151645  | 74.84328468 | ABCG1                 |
| 102486497  | 323.9442544 | 51.18993635 | IL1AP                 |
| 102486709  | 9184.834312 | 360.8457227 | MT1C                  |
| 102487165  | 119.6214415 | 28.04521508 | NSUN3                 |
| 102487490  | 2045.098806 | 441.6792788 | MEPE                  |
| 102489626  | 1219.387876 | 327.3416891 | ABCA1                 |
| 102489982  | 814.1739429 | 222.7708328 | S36A4                 |
| 102491778  | 376.1387914 | 59.08760569 | HYAS2                 |
| 102492385  | 364.2684885 | 79.36628883 | CLC4D                 |
| 102493244  | 2165.389952 | 22.26920314 | ILRL1                 |
| 102495718  | 834.8841443 | 153.1582542 | KLF9                  |
| 102496910  | 4683.050488 | 1225.029939 | FKBP5                 |
| 102500090  | 285.8270759 | 67.7613362  | S12A5                 |
| 102500678  | 252.2599073 | 42.51886108 | FMO2                  |
| 102501016  | 506.4869226 | 119.5421078 | NR1D2                 |
| 102501796  | 1226.589833 | 156.4431932 | FMO3                  |
| 106733861  | 480.0445683 | 102.4225874 | IRS2                  |
| 106734708  | 51.30653441 | 10.22446848 | -                     |
| 106735723  | 670.701312  | 142.026703  | -                     |
| Novel00395 | 29.57401141 | 0.681661469 | -                     |
| Novel02247 | 17.34167411 | 2.581791505 | -                     |
| Novel03205 | 33.74454021 | 5.051410925 | -                     |
| Novel04560 | 61.63647368 | 11.71092686 | -                     |
| Novel04871 | 3225.795427 | 36.32573201 | -                     |
| Novel04981 | 29.68926767 | 3.663588012 | -                     |

FPKM, fragments per kilobase of transcript per million mapped reads.
